# Supplementary material for: Effectiveness of Self-Adhesive Resin Luting Cement in CAD-CAM Blocks—A Systematic Review and Meta-Analysis
Source: MDPI journal article supplement (doi:10.3390/ma16082996), 2023-04-10
Supplement: s1 [file s1]

|                             |                |                                   |                |                           |            |      |       |   |       |       |   |       |       |      |       |      |       |        |      |      |      |       |       |      |    |        |             |
|-----------------------------|----------------|-----------------------------------|----------------|---------------------------|------------|------|-------|---|-------|-------|---|-------|-------|------|-------|------|-------|--------|------|------|------|-------|-------|------|----|--------|-------------|
| Elsaka et al (2014) [35]    | Vita Enamic    | HF 9% AI2O3 50 µm + Silane        | 24 hours water | NO                        | Bifix SE   | µTBS | 23.86 | 3 | 3.19  | 11.99 | 3 | 2.52  | 2.87  | 0.38 | 11.87 | 0.01 | 5.35  | 18.39  | 4.13 | 3.29 | 1.25 | 0.84  | 5.75  | 4.71 | 37 | 0.9796 | 0.979591837 |
| Elsaka et al (2014) [35]    | Vita Enamic    | No treatment AI2O3 50 µm + Silane | 30 days water  | Ultradent Silane          | Bifix SE   | µTBS | 19.48 | 3 | 3.18  | 11.99 | 3 | 2.52  | 2.87  | 0.39 | 7.49  | 0.03 | 0.99  | 13.99  | 2.61 | 2.08 | 1.01 | 0.10  | 4.07  | 2.97 | 38 | 0.9801 | 0.98013245  |
| Elsaka et al (2014) [35]    | Vita Enamic    | HF 9% AI2O3 50 µm + Silane        | 30 days water  | NO                        | Bifix SE   | µTBS | 12.67 | 3 | 2.13  | 11.99 | 3 | 2.52  | 2.33  | 0.42 | 0.68  | 0.74 | -4.61 | 5.97   | 0.29 | 0.23 | 0.82 | -1.37 | 1.84  | 0.27 | 39 | 0.9806 | 0.980645161 |
| Elsaka et al (2014) [35]    | Vita Enamic    | HF 9% AI2O3 50 µm + Silane        | 24 hours water | Ultradent Silane          | Bifix SE   | µTBS | 24.95 | 3 | 3.79  | 11.99 | 3 | 2.52  | 3.22  | 0.31 | 12.96 | 0.01 | 5.66  | 20.26  | 4.03 | 3.21 | 1.24 | 0.79  | 5.64  | 5.14 | 40 | 0.9811 | 0.981132075 |
| Elsaka et al (2014) [35]    | Vita Enamic    | HF 9% AI2O3 50 µm + Silane        | 30 days water  | NO                        | Bifix SE   | µTBS | 18.86 | 3 | 3.31  | 11.99 | 3 | 2.52  | 2.94  | 0.37 | 6.87  | 0.05 | 0.20  | 13.54  | 2.34 | 1.86 | 0.98 | -0.05 | 3.78  | 2.73 | 41 | 0.9816 | 0.981595092 |
| Elsaka et al (2014) [35]    | Vita Enamic    | HF 9% + SILANE                    | 24 hours water | NO                        | Bifix SE   | µTBS | 21.87 | 3 | 3.75  | 11.99 | 3 | 2.52  | 3.19  | 0.31 | 9.88  | 0.02 | 2.64  | 17.12  | 3.09 | 2.47 | 1.08 | 0.34  | 4.59  | 3.92 | 42 | 0.982  | 0.982035928 |
| Elsaka et al (2014) [35]    | Vita Enamic    | HF 9% + SILANE                    | 30 days water  | NO                        | Bifix SE   | µTBS | 16.71 | 3 | 3.42  | 11.99 | 3 | 2.52  | 3.00  | 0.35 | 4.72  | 0.13 | -2.09 | 11.53  | 1.57 | 1.25 | 0.89 | -0.50 | 3.00  | 1.87 | 43 | 0.9824 | 0.98245614  |
| Higashi et al (2016) [1]    | Katana Avencia | AI2O3 50 µm                       | No water       | NO                        | Panavia SA | µTBS | 22.21 | 3 | 3.04  | 11.99 | 3 | 2.52  | 2.79  | 0.41 | 10.22 | 0.01 | 3.89  | 16.55  | 3.66 | 2.92 | 1.17 | 0.62  | 5.22  | 4.06 | 44 | 0.9828 | 0.982857143 |
| Higashi et al (2016) [1]    | Katana Avencia | No treatment                      | 3 months water | NO                        | Panavia SA | µTBS | 66.02 | 3 | 10.67 | 25.03 | 3 | 12.34 | 11.54 | 0.43 | 40.99 | 0.01 | 14.84 | 67.14  | 3.55 | 2.84 | 1.16 | 0.57  | 5.10  | 3.32 | 45 | 0.9832 | 0.983240223 |
| Higashi et al (2016) [1]    | Katana Avencia | AI2O3 50 µm + Silane              | No water       | NO                        | Panavia SA | µTBS | 26.05 | 3 | 7.66  | 25.03 | 3 | 12.34 | 10.27 | 0.28 | 1.02  | 0.91 | 22.26 | 24.30  | 0.10 | 0.08 | 0.82 | -1.52 | 1.68  | 0.08 | 46 | 0.9836 | 0.983606557 |
| Higashi et al (2016) [1]    | Katana Avencia | AI2O3 50 µm + Silane              | 3 months water | NO                        | Panavia SA | µTBS | 65.75 | 3 | 15.37 | 25.03 | 3 | 12.34 | 13.94 | 0.39 | 40.72 | 0.02 | 9.12  | 72.32  | 2.92 | 2.33 | 1.06 | 0.26  | 4.40  | 3.30 | 47 | 0.9839 | 0.983957219 |
| Higashi et al (2016) [1]    | Katana Avencia | No treatment                      | No water       | NO                        | Panavia SA | µTBS | 59.31 | 3 | 13.44 | 25.03 | 3 | 12.34 | 12.90 | 0.46 | 34.28 | 0.03 | 5.03  | 63.53  | 2.66 | 2.12 | 1.02 | 0.12  | 4.12  | 2.78 | 48 | 0.9843 | 0.984293194 |
| Higashi et al (2016) [1]    | Katana Avencia | AI2O3 50 µm + Silane              | No water       | NO                        | Panavia SA | µTBS | 40.42 | 3 | 11.36 | 25.03 | 3 | 12.34 | 11.86 | 0.46 | 15.39 | 0.19 | 11.50 | 42.28  | 1.30 | 1.04 | 0.87 | -0.67 | 2.74  | 1.25 | 49 | 0.9846 | 0.984615385 |
| Higashi et al (2016) [1]    | Katana Avencia | SILANE                            | 3 months water | Clearfil Cer. Primer Plus | Panavia SA | µTBS | 60.04 | 3 | 15.93 | 25.03 | 3 | 12.34 | 14.25 | 0.38 | 35.01 | 0.04 | 2.71  | 67.31  | 2.46 | 1.96 | 0.99 | 0.01  | 3.91  | 2.84 | 50 | 0.9849 | 0.984924623 |
| Higashi et al (2016) [1]    | Katana Avencia | SILANE                            | No water       | Clearfil Cer. Primer Plus | Panavia SA | µTBS | 70.95 | 3 | 11.90 | 25.03 | 3 | 12.34 | 12.12 | 0.48 | 45.92 | 0.01 | 18.44 | 73.40  | 3.79 | 3.02 | 1.19 | 0.68  | 5.36  | 3.72 | 52 | 0.9855 | 0.985507246 |
| Higashi et al (2016) [1]    | Katana Avencia | SILANE                            | 3 months water | Clearfil Cer. Primer Plus | Panavia SA | µTBS | 55.71 | 3 | 9.91  | 25.03 | 3 | 12.34 | 11.19 | 0.39 | 30.68 | 0.03 | 5.31  | 56.05  | 2.74 | 2.19 | 1.03 | 0.16  | 4.21  | 2.49 | 54 | 0.986  | 0.986046512 |
| Higashi et al (2016) [1]    | Katana Avencia | No treatment                      | 1 month water  | NO                        | Panavia SA | µTBS | 33.02 | 3 | 16.45 | 25.03 | 3 | 12.34 | 14.54 | 0.36 | 7.99  | 0.54 | 24.97 | 40.95  | 0.55 | 0.44 | 0.83 | -1.18 | 2.06  | 0.65 | 56 | 0.9865 | 0.986547085 |
| Higashi et al (2016) [1]    | Katana Avencia | SILANE                            | 6 months water | Clearfil Cer. Primer Plus | Panavia SA | µTBS | 54.24 | 3 | 11.44 | 25.03 | 3 | 12.34 | 11.90 | 0.46 | 29.21 | 0.04 | 2.24  | 56.18  | 2.45 | 1.96 | 0.99 | 0.01  | 3.91  | 2.37 | 58 | 0.987  | 0.987012987 |
| Higashi et al (2016) [1]    | Katana Avencia | AI2O3 50 µm + Silane              | 1 month water  | Clearfil Cer. Primer Plus | Panavia SA | µTBS | 55.59 | 3 | 14.23 | 25.03 | 3 | 12.34 | 13.32 | 0.43 | 30.56 | 0.05 | 0.37  | 60.75  | 2.29 | 1.83 | 0.97 | -0.08 | 3.74  | 2.48 | 60 | 0.9874 | 0.987447699 |
| Higashi et al (2016) [1]    | Katana Avencia | AI2O3 50 µm                       | 6 months water | NO                        | Panavia SA | µTBS | 59.44 | 3 | 20.40 | 25.03 | 3 | 12.34 | 16.86 | 0.27 | 34.41 | 0.07 | -3.81 | 72.63  | 2.04 | 1.63 | 0.94 | -0.22 | 3.48  | 2.79 | 62 | 0.9879 | 0.987854251 |
| Higashi et al (2016) [1]    | Katana Avencia | SILANE                            | 1 month water  | Clearfil Cer. Primer Plus | Panavia SA | µTBS | 64.29 | 3 | 15.87 | 25.03 | 3 | 12.34 | 14.22 | 0.38 | 39.26 | 0.03 | 7.04  | 71.48  | 2.76 | 2.20 | 1.04 | 0.18  | 4.23  | 3.18 | 64 | 0.9882 | 0.988235294 |
| Higashi et al (2016) [1]    | Katana Avencia | AI2O3 50 µm                       | 1 month water  | NO                        | Panavia SA | µTBS | 68.46 | 3 | 19.06 | 25.03 | 3 | 12.34 | 16.06 | 0.30 | 43.43 | 0.03 | 7.03  | 79.83  | 2.70 | 2.16 | 1.03 | 0.15  | 4.17  | 3.52 | 66 | 0.9886 | 0.988593156 |
| Higashi et al (2016) [1]    | Katana Avencia | AI2O3 50 µm + Silane              | 6 months water | Clearfil Cer. Primer Plus | Panavia SA | µTBS | 56.44 | 3 | 17.88 | 25.03 | 3 | 12.34 | 15.36 | 0.32 | 31.41 | 0.07 | -3.41 | 66.23  | 2.04 | 1.63 | 0.94 | -0.22 | 3.48  | 2.55 | 68 | 0.9889 | 0.988929889 |
| Higashi et al (2016) [1]    | Katana Avencia | AI2O3 50 µm                       | 6 months water | NO                        | Panavia v5 | µTBS | 82.41 | 3 | 27.64 | 24.02 | 3 | 9.59  | 20.69 | 0.11 | 58.39 | 0.03 | 11.49 | 105.29 | 2.82 | 2.25 | 1.04 | 0.21  | 4.30  | 6.09 | 70 | 0.9892 | 0.989247312 |
| Higashi et al (2016) [1]    | Katana Avencia | No treatment                      | 3 months water | NO                        | Panavia v5 | µTBS | 23.15 | 3 | 12.39 | 24.02 | 3 | 9.59  | 11.08 | 0.37 | 0.87  | 0.93 | 24.25 | 25.99  | 0.08 | 0.06 | 0.82 | -1.54 | 1.66  | 0.09 | 72 | 0.9895 | 0.989547038 |
| Higashi et al (2016) [1]    | Katana Avencia | AI2O3 50 µm                       | 1 month water  | NO                        | Panavia v5 | µTBS | 63.51 | 3 | 13.37 | 24.02 | 3 | 9.59  | 11.63 | 0.34 | 39.49 | 0.01 | 13.11 | 65.87  | 3.39 | 2.71 | 1.13 | 0.49  | 4.92  | 4.12 | 74 | 0.9898 | 0.989830508 |
| Higashi et al (2016) [1]    | Katana Avencia | AI2O3 50 µm + Silane              | 1 month water  | Clearfil Cer. Primer Plus | Panavia v5 | µTBS | 84.24 | 3 | 11.43 | 24.02 | 3 | 9.59  | 10.55 | 0.41 | 60.22 | 0.00 | 36.30 | 84.14  | 5.71 | 4.55 | 1.55 | 1.52  | 7.59  | 6.28 | 76 | 0.9901 | 0.99009901  |
| Higashi et al (2016) [1]    | Katana Avencia | AI2O3 50 µm                       | No water       | NO                        | Panavia v5 | µTBS | 78.40 | 3 | 12.65 | 24.02 | 3 | 9.59  | 11.22 | 0.36 | 54.38 | 0.00 | 28.93 | 79.83  | 4.84 | 3.87 | 1.38 | 1.16  | 6.58  | 5.67 |    |        |             |
| Higashi et al (2016) [1]    | Katana Avencia | AI2O3 50 µm + Silane              | 3 months water | Clearfil Cer. Primer Plus | Panavia v5 | µTBS | 80.73 | 3 | 18.22 | 24.02 | 3 | 9.59  | 14.56 | 0.22 | 56.71 | 0.01 | 23.71 | 89.71  | 3.90 | 3.11 | 1.21 | 0.73  | 5.49  | 5.91 |    |        |             |
| Higashi et al (2016) [1]    | Katana Avencia | SILANE                            | 6 months water | Clearfil Cer. Primer Plus | Panavia v5 | µTBS | 59.60 | 3 | 13.10 | 24.02 | 3 | 9.59  | 11.48 | 0.35 | 35.58 | 0.02 | 9.56  | 61.60  | 3.10 | 2.47 | 1.08 | 0.35  | 4.60  | 3.71 |    |        |             |
| Higashi et al (2016) [1]    | Katana Avencia | AI2O3 50 µm + Silane              | No water       | Clearfil Cer. Primer Plus | Panavia v5 | µTBS | 86.98 | 3 | 6.40  | 24.02 | 3 | 9.59  | 8.15  | 0.31 | 62.96 | 0.00 | 44.48 | 81.44  | 7.72 | 6.16 | 1.96 | 2.33  | 10.00 | 6.57 |    |        |             |
| Higashi et al (2016) [1]    | Katana Avencia | SILANE                            | 3 months water | Clearfil Cer. Primer Plus | Panavia v5 | µTBS | 66.73 | 3 | 13.65 | 24.02 | 3 | 9.59  | 11.80 | 0.33 | 42.71 | 0.01 | 15.97 | 69.45  | 3.62 | 2.89 | 1.17 | 0.60  | 5.18  | 4.45 |    |        |             |
| Higashi et al (2016) [1]    | Katana Avencia | AI2O3 50 µm + Silane              | 6 months water | Clearfil Cer. Primer Plus | Panavia v5 | µTBS | 79.42 | 3 | 11.42 | 24.02 | 3 | 9.59  | 10.54 | 0.41 | 55.40 | 0.00 | 31.50 | 79.30  | 5.25 | 4.19 | 1.46 | 1.33  | 7.05  | 5.78 |    |        |             |
| Higashi et al (2016) [1]    | Katana Avencia | SILANE                            | No water       | Clearfil Cer. Primer Plus | Panavia v5 | µTBS | 82.51 | 3 | 12.36 | 24.02 | 3 | 9.59  | 11.06 | 0.38 | 58.49 | 0.00 | 33.41 | 83.57  | 5.29 | 4.22 | 1.47 | 1.35  | 7.09  | 6.10 |    |        |             |
| Higashi et al (2016) [1]    | Katana Avencia | SILANE                            | 1 month water  | Clearfil Cer. Primer Plus | Panavia v5 | µTBS | 78.59 | 3 | 13.57 | 24.02 | 3 | 9.59  | 11.75 | 0.33 | 54.57 | 0.00 | 27.93 | 81.21  | 4.64 | 3.71 | 1.35 | 1.07  | 6.34  | 5.69 |    |        |             |
| Higashi et al (2016) [1]    | Katana Avencia | No treatment                      | No water       | NO                        | Panavia v5 | µTBS | 37.19 | 3 | 13.33 | 24.02 | 3 | 9.59  | 11.61 | 0.34 | 13.17 | 0.24 | 13.15 | 39.49  | 1.13 | 0.90 | 0.86 | -0.78 | 2.59  | 1.37 |    |        |             |
| Higashi et al (2016) [1]    | Katana Avencia | No treatment                      | 6 months water | NO                        | Panavia v5 | µTBS | 25.10 | 3 | 13.57 | 24.02 | 3 | 9.59  | 11.75 | 0.33 | 1.08  | 0.92 | 25.56 | 27.72  | 0.09 | 0.07 | 0.82 | -1.53 | 1.67  | 0.11 |    |        |             |
| Higashi et al (2016) [1]    | Katana Avencia | AI2O3 50 µm                       | 3 months water | NO                        | Panavia v5 | µTBS | 76.18 | 3 | 15.53 | 24.02 | 3 | 9.59  | 12.91 | 0.28 | 52.16 | 0.01 | 22.90 | 81.42  | 4.04 | 3.22 | 1.24 | 0.80  | 5.65  | 5.44 |    |        |             |
| Kawaguchi et al (2016) [10] | Katana Avencia | PA 40%                            | 6 months water | Clearfil Cer. Primer Plus | Panavia SA | µTBS | 46.10 | 3 | 14.30 | 46.70 | 3 | 10.90 | 12.71 | 0.37 | 0.60  | 0.96 | 28.22 | 29.42  | 0.05 | 0.04 | 0.82 | -1.56 | 1.64  | 0.06 |    |        |             |

|                             |                |                                   |                          |                           |               |      |       |    |       |       |    |       |       |      |       |      |       |       |       |       |      |       |       |       |
|-----------------------------|----------------|-----------------------------------|--------------------------|---------------------------|---------------|------|-------|----|-------|-------|----|-------|-------|------|-------|------|-------|-------|-------|-------|------|-------|-------|-------|
| Kawaguchi et al (2016) [10] | Katana Avencia | Ultrass. cleaning + PA 40%        | No water                 | Clearfil Cer. Primer Plus | Panavia SA    | µTBS | 63.90 | 3  | 10.90 | 46.70 | 3  | 10.90 | 10.90 | 0.50 | 17.20 | 0.13 | -7.51 | 41.91 | 1.58  | 1.26  | 0.89 | -0.49 | 3.01  | 1.58  |
| Kawaguchi et al (2016) [10] | Katana Avencia | Ultrass. cleaning                 | 1 month water            | Clearfil Cer. Primer Plus | Panavia SA    | µTBS | 55.30 | 3  | 9.40  | 46.70 | 3  | 10.90 | 10.18 | 0.43 | 8.60  | 0.36 | 14.47 | 31.67 | 0.84  | 0.67  | 0.84 | -0.97 | 2.32  | 0.79  |
| Kawaguchi et al (2016) [10] | Katana Avencia | PA 40%                            | 1 month water            | Clearfil Cer. Primer Plus | Panavia SA    | µTBS | 62.40 | 3  | 8.20  | 46.70 | 3  | 10.90 | 9.64  | 0.36 | 15.70 | 0.12 | -6.16 | 37.56 | 1.63  | 1.30  | 0.90 | -0.46 | 3.06  | 1.44  |
| Kawaguchi et al (2016) [10] | Katana Avencia | PA 40%                            | No water                 | Clearfil Cer. Primer Plus | Panavia SA    | µTBS | 62.60 | 3  | 9.90  | 46.70 | 3  | 10.90 | 10.41 | 0.45 | 15.90 | 0.13 | -7.70 | 39.50 | 1.53  | 1.22  | 0.89 | -0.52 | 2.96  | 1.46  |
| Kawaguchi et al (2016) [10] | Katana Avencia | No cleaning treatment             | 3 months water           | Clearfil Cer. Primer Plus | Panavia SA    | µTBS | 54.00 | 3  | 10.90 | 46.70 | 3  | 10.90 | 10.90 | 0.50 | 7.30  | 0.46 | 17.41 | 32.01 | 0.67  | 0.53  | 0.83 | -1.09 | 2.16  | 0.67  |
| Kawaguchi et al (2016) [10] | Katana Avencia | No cleaning treatment             | 6 months water           | Clearfil Cer. Primer Plus | Panavia SA    | µTBS | 48.80 | 3  | 10.00 | 46.70 | 3  | 10.90 | 10.46 | 0.46 | 2.10  | 0.82 | 21.61 | 25.81 | 0.20  | 0.16  | 0.82 | -1.44 | 1.76  | 0.19  |
| Kawaguchi et al (2016) [10] | Katana Avencia | Ultrass. cleaning                 | 3 months water           | Clearfil Cer. Primer Plus | Panavia SA    | µTBS | 55.80 | 3  | 11.30 | 46.70 | 3  | 10.90 | 11.10 | 0.48 | 9.10  | 0.37 | 16.07 | 34.27 | 0.82  | 0.65  | 0.84 | -0.99 | 2.30  | 0.83  |
| Kawaguchi et al (2016) [10] | Katana Avencia | PA 40% Ultrass.                   | 3 months water           | Clearfil Cer. Primer Plus | Panavia SA    | µTBS | 49.50 | 3  | 16.50 | 46.70 | 3  | 10.90 | 13.98 | 0.30 | 2.80  | 0.82 | 28.90 | 34.50 | 0.20  | 0.16  | 0.82 | -1.44 | 1.76  | 0.26  |
| Kawaguchi et al (2016) [10] | Katana Avencia | cleaning + PA 40%                 | 1 month water            | Clearfil Cer. Primer Plus | Panavia SA    | µTBS | 62.90 | 3  | 12.50 | 46.70 | 3  | 10.90 | 11.73 | 0.43 | 16.20 | 0.17 | 10.39 | 42.79 | 1.38  | 1.10  | 0.88 | -0.62 | 2.82  | 1.49  |
| Kawaguchi et al (2016) [10] | Katana Avencia | No cleaning treatment             | 1 month water            | Clearfil Cer. Primer Plus | Panavia SA    | µTBS | 60.90 | 3  | 11.00 | 46.70 | 3  | 10.90 | 10.95 | 0.50 | 14.20 | 0.19 | 10.62 | 39.02 | 1.30  | 1.03  | 0.87 | -0.67 | 2.74  | 1.30  |
| Kawaguchi et al (2016) [10] | Katana Avencia | Ultrass. cleaning                 | No water                 | Clearfil Cer. Primer Plus | Panavia SA    | µTBS | 62.60 | 3  | 9.90  | 46.70 | 3  | 10.90 | 10.41 | 0.45 | 15.90 | 0.13 | -7.70 | 39.50 | 1.53  | 1.22  | 0.89 | -0.52 | 2.96  | 1.46  |
| Kawaguchi et al (2016) [10] | Katana Avencia | Ultrass. cleaning                 | 6 months water           | Clearfil Cer. Primer Plus | Panavia SA    | µTBS | 48.80 | 3  | 10.50 | 46.70 | 3  | 10.90 | 10.70 | 0.48 | 2.10  | 0.82 | 22.16 | 26.36 | 0.20  | 0.16  | 0.82 | -1.45 | 1.76  | 0.19  |
| Kawaguchi et al (2016) [10] | Katana Avencia | Ultrass. cleaning + PA 40%        | 6 months water           | Clearfil Cer. Primer Plus | Panavia SA    | µTBS | 46.70 | 3  | 13.10 | 46.70 | 3  | 10.90 | 12.05 | 0.41 | 0.00  | 1.00 | 27.32 | 27.32 | 0.00  | 0.00  | 0.82 | -1.60 | 1.60  | 0.00  |
| Kawaguchi et al (2016) [10] | Katana Avencia | No cleanino treatment             | No water                 | Clearfil Cer. Primer Plus | Panavia SA    | µTBS | 62.70 | 3  | 10.40 | 46.70 | 3  | 10.90 | 10.65 | 0.48 | 16.00 | 0.14 | -8.15 | 40.15 | 1.50  | 1.20  | 0.89 | -0.54 | 2.94  | 1.47  |
| Kawaguchi et al (2016) [10] | Katana Avencia | PA 40%                            | No water                 | Clearfil Cer. Primer Plus | Panavia v5    | µTBS | 81.10 | 3  | 7.60  | 70.00 | 3  | 13.90 | 11.20 | 0.23 | 11.10 | 0.29 | 14.29 | 36.49 | 0.99  | 0.79  | 0.85 | -0.87 | 2.45  | 0.80  |
| Kawaguchi et al (2016) [10] | Katana Avencia | No cleaning treatment             | 1 month water            | Clearfil Cer. Primer Plus | Panavia v5    | µTBS | 98.10 | 3  | 11.50 | 70.00 | 3  | 13.90 | 12.76 | 0.41 | 28.10 | 0.05 | -0.82 | 57.02 | 2.20  | 1.76  | 0.96 | -0.13 | 3.64  | 2.02  |
| Kawaguchi et al (2016) [10] | Katana Avencia | Ultrass. cleaning + PA 40%        | 6 months water           | Clearfil Cer. Primer Plus | Panavia v5    | µTBS | 65.90 | 3  | 14.60 | 70.00 | 3  | 13.90 | 14.25 | 0.48 | 4.10  | 0.74 | 28.21 | 36.41 | 0.29  | 0.23  | 0.82 | -1.38 | 1.84  | 0.29  |
| Kawaguchi et al (2016) [10] | Katana Avencia | Ultrass. cleaning + PA 40%        | 3 months water           | Clearfil Cer. Primer Plus | Panavia v5    | µTBS | 70.10 | 3  | 10.00 | 70.00 | 3  | 13.90 | 12.11 | 0.34 | 0.10  | 0.99 | 27.35 | 27.55 | 0.01  | 0.01  | 0.82 | -1.59 | 1.61  | 0.01  |
| Kawaguchi et al (2016) [10] | Katana Avencia | PA 40%                            | 3 months water           | Clearfil Cer. Primer Plus | Panavia v5    | µTBS | 69.60 | 3  | 13.90 | 70.00 | 3  | 13.90 | 13.90 | 0.50 | 0.40  | 0.97 | 31.11 | 31.91 | 0.03  | 0.02  | 0.82 | -1.58 | 1.62  | 0.03  |
| Kawaguchi et al (2016) [10] | Katana Avencia | Ultrass. cleaning                 | 6 months water           | Clearfil Cer. Primer Plus | Panavia v5    | µTBS | 64.60 | 3  | 9.00  | 70.00 | 3  | 13.90 | 11.71 | 0.30 | 5.40  | 0.60 | 21.14 | 31.94 | 0.46  | 0.37  | 0.82 | -1.25 | 1.98  | 0.39  |
| Kawaguchi et al (2016) [10] | Katana Avencia | PA 40% Ultrass. cleaning + PA 40% | 1 month water            | Clearfil Cer. Primer Plus | Panavia v5    | µTBS | 70.10 | 3  | 11.60 | 70.00 | 3  | 13.90 | 12.80 | 0.41 | 0.10  | 0.99 | 28.92 | 29.12 | 0.01  | 0.01  | 0.82 | -1.59 | 1.61  | 0.01  |
| Kawaguchi et al (2016) [10] | Katana Avencia | Ultrass. cleaning + PA 40%        | 1 month water            | Clearfil Cer. Primer Plus | Panavia v5    | µTBS | 70.00 | 3  | 9.80  | 70.00 | 3  | 13.90 | 12.03 | 0.33 | 0.00  | 1.00 | 27.26 | 27.26 | 0.00  | 0.00  | 0.82 | -1.60 | 1.60  | 0.00  |
| Kawaguchi et al (2016) [10] | Katana Avencia | Ultrass. cleaning                 | 3 months water           | Clearfil Cer. Primer Plus | Panavia v5    | µTBS | 72.70 | 3  | 10.40 | 70.00 | 3  | 13.90 | 12.28 | 0.36 | 2.70  | 0.80 | 25.13 | 30.53 | 0.22  | 0.18  | 0.82 | -1.43 | 1.78  | 0.19  |
| Kawaguchi et al (2016) [10] | Katana Avencia | UC + AC                           | No water                 | Clearfil Cer. Primer Plus | Panavia v5    | µTBS | 82.90 | 3  | 11.70 | 70.00 | 3  | 13.90 | 12.85 | 0.41 | 12.90 | 0.29 | 16.22 | 42.02 | 1.00  | 0.80  | 0.85 | -0.86 | 2.46  | 0.93  |
| Kawaguchi et al (2016) [10] | Katana Avencia | Ultrass. cleaning                 | 1 month water            | Clearfil Cer. Primer Plus | Panavia v5    | µTBS | 60.00 | 3  | 9.30  | 70.00 | 3  | 13.90 | 11.83 | 0.31 | 10.00 | 0.36 | 16.81 | 36.81 | 0.85  | 0.67  | 0.84 | -0.97 | 2.32  | 0.72  |
| Kawaguchi et al (2016) [10] | Katana Avencia | Ultrass. cleaning                 | No water                 | Clearfil Cer. Primer Plus | Panavia v5    | µTBS | 87.60 | 3  | 8.90  | 70.00 | 3  | 13.90 | 11.67 | 0.29 | 17.60 | 0.14 | -8.86 | 44.06 | 1.51  | 1.20  | 0.89 | -0.54 | 2.94  | 1.27  |
| Kawaguchi et al (2016) [10] | Katana Avencia | No cleaning treatment             | No water                 | Clearfil Cer. Primer Plus | Panavia v5    | µTBS | 96.50 | 3  | 10.30 | 70.00 | 3  | 13.90 | 12.23 | 0.35 | 26.50 | 0.06 | -1.23 | 54.23 | 2.17  | 1.73  | 0.96 | -0.15 | 3.60  | 1.91  |
| Kawaguchi et al (2016) [10] | Katana Avencia | No cleaning treatment             | 6 months water           | Clearfil Cer. Primer Plus | Panavia v5    | µTBS | 78.00 | 3  | 14.40 | 70.00 | 3  | 13.90 | 14.15 | 0.48 | 8.00  | 0.53 | 24.08 | 40.08 | 0.57  | 0.45  | 0.83 | -1.17 | 2.07  | 0.58  |
| Kawaguchi et al (2016) [10] | Katana Avencia | No cleaning treatment             | 3 months water           | Clearfil Cer. Primer Plus | Panavia v5    | µTBS | 89.70 | 3  | 11.80 | 70.00 | 3  | 13.90 | 12.89 | 0.42 | 19.70 | 0.13 | -9.53 | 48.93 | 1.53  | 1.22  | 0.89 | -0.52 | 2.96  | 1.42  |
| Liebermann et al (2013) [2] | ArtBlock temp  | AI2O3 50 µm                       | 24 h water + 5000 cycles | Visiolink                 | Clearfil SA   | TBS  | 17.30 | 20 | 5.30  | 7.10  | 20 | 7.80  | 6.67  | 0.05 | 10.20 | 0.00 | 5.93  | 14.47 | 1.53  | 1.50  | 0.36 | 0.80  | 2.20  | 1.31  |
| Liebermann et al (2013) [2] | ArtBlock temp  | AI2O3 50 µm                       | 24 h water + 5000 cycles | VP Connect                | Clearfil SA   | TBS  | 17.90 | 20 | 4.60  | 7.10  | 20 | 7.80  | 6.40  | 0.01 | 10.80 | 0.00 | 6.70  | 14.90 | 1.69  | 1.65  | 0.37 | 0.94  | 2.37  | 1.38  |
| Liebermann et al (2013) [2] | ArtBlock temp  | AI2O3 50 µm                       | 24 h water + 5000 cycles | Visiolink                 | Clearfil SA   | TBS  | 28.80 | 20 | 6.30  | 7.10  | 20 | 7.80  | 7.09  | 0.18 | 21.70 | 0.00 | 17.16 | 26.24 | 3.06  | 3.00  | 0.46 | 2.10  | 3.90  | 2.78  |
| Liebermann et al (2013) [2] | ArtBlock temp  | AI2O3 50 µm                       | 24 h water + 5000 cycles | VP Connect                | Clearfil SA   | TBS  | 25.60 | 20 | 4.30  | 7.10  | 20 | 7.80  | 6.30  | 0.01 | 18.50 | 0.00 | 14.47 | 22.53 | 2.94  | 2.88  | 0.45 | 1.99  | 3.76  | 2.37  |
| Liebermann et al (2013) [2] | ArtBlock temp  | AI2O3 50 µm                       | 24 h water + 5000 cycles | Visiolink                 | Rely X Unicem | TBS  | 29.00 | 20 | 6.30  | 2.00  | 20 | 6.20  | 6.25  | 0.47 | 27.00 | 0.00 | 23.00 | 31.00 | 4.32  | 4.23  | 0.57 | 3.12  | 5.35  | 4.35  |
| Liebermann et al (2013) [2] | ArtBlock temp  | AI2O3 50 µm                       | 24 h water + 5000 cycles | NO                        | Rely X Unicem | TBS  | 10.20 | 20 | 11.90 | 2.00  | 20 | 6.20  | 9.49  | 0.00 | 8.20  | 0.01 | 2.13  | 14.27 | 0.86  | 0.85  | 0.33 | 0.20  | 1.49  | 1.32  |
| Liebermann et al (2013) [2] | ArtBlock temp  | AI2O3 50 µm                       | 24 h water + 5000 cycles | Visiolink                 | Rely X Unicem | TBS  | 17.60 | 20 | 4.10  | 2.00  | 20 | 6.20  | 5.26  | 0.04 | 15.60 | 0.00 | 12.24 | 18.96 | 2.97  | 2.91  | 0.45 | 2.02  | 3.80  | 2.52  |
| Liebermann et al (2013) [2] | ArtBlock temp  | AI2O3 50 µm                       | 24 h water + 5000 cycles | VP Connect                | Rely X Unicem | TBS  | 2.10  | 20 | 4.10  | 2.00  | 20 | 6.20  | 5.26  | 0.04 | 0.10  | 0.95 | -3.26 | 3.46  | 0.02  | 0.02  | 0.32 | -0.60 | 0.64  | 0.02  |
| Malysa et al (2022) [37]    | Empress CAD    | HF 5%                             | No Thermal Cycling       | NO                        | Maxcem        | SBS  | 15.48 | 12 | 1.16  | 2.06  | 12 | 0.45  | 0.88  | 0.00 | 13.42 | 0.00 | 12.68 | 14.16 | 15.30 | 14.77 | 2.17 | 10.52 | 19.03 | 30.16 |

|                          |                        |                |                    |                           |                  |      |       |    |      |       |    |      |      |      |       |      |       |       |       |       |      |       |       |       |
|--------------------------|------------------------|----------------|--------------------|---------------------------|------------------|------|-------|----|------|-------|----|------|------|------|-------|------|-------|-------|-------|-------|------|-------|-------|-------|
| Malysa et al (2022) [37] | Empress CAD IPS        | HF 5%          | Thermal Cycling    | NO                        | Maxcem           | SBS  | 3.37  | 12 | 0.23 | 2.06  | 12 | 0.45 | 0.35 | 0.02 | 1.31  | 0.00 | 1.01  | 1.61  | 3.71  | 3.58  | 0.66 | 2.29  | 4.87  | 2.95  |
| Malysa et al (2022) [37] | Empress CAD IPS e max. | HF 5%          | .                  | NO                        | Maxcem           | SBS  | 12.11 | 12 | 1.27 | 2.06  | 12 | 0.45 | 0.95 | 0.00 | 10.05 | 0.00 | 9.24  | 10.86 | 10.53 | 10.17 | 1.52 | 7.18  | 13.16 | 22.59 |
| Malysa et al (2022) [37] | Zircad IPS e max.      | HF 5%          | Thermal Cycling    | NO                        | Maxcem           | SBS  | 2.32  | 12 | 0.18 | 2.06  | 12 | 0.45 | 0.34 | 0.00 | 0.26  | 0.07 | -0.03 | 0.55  | 0.77  | 0.74  | 0.42 | -0.08 | 1.57  | 0.59  |
| Malysa et al (2022) [37] | Zircad IPS e max.      | HF 5%          | No Thermal Cycling | NO                        | Maxcem           | SBS  | 13.29 | 12 | 1.19 | 2.06  | 12 | 0.45 | 0.90 | 0.00 | 11.23 | 0.00 | 10.47 | 11.99 | 12.55 | 12.12 | 1.80 | 8.60  | 15.64 | 25.24 |
| Malysa et al (2022) [37] | Zircad                 | HF 5%          | .                  | NO                        | Maxcem           | SBS  | 10.97 | 12 | 1.21 | 2.06  | 12 | 0.45 | 0.91 | 0.00 | 8.91  | 0.00 | 8.14  | 9.68  | 9.76  | 9.42  | 1.42 | 6.64  | 12.21 | 20.03 |
| Malysa et al (2022) [37] | IPS e.max CAD          | HF 5% + PA 37% | No Thermal Cycling | NO                        | Maxcem           | SBS  | 8.43  | 12 | 0.87 | 2.06  | 12 | 0.45 | 0.69 | 0.02 | 6.37  | 0.00 | 5.79  | 6.95  | 9.24  | 8.93  | 1.35 | 6.28  | 11.57 | 14.31 |
| Malysa et al (2022) [37] | IPS e.max CAD          | HF 5% + PA 37% | .                  | NO                        | Maxcem           | SBS  | 6.37  | 12 | 0.74 | 2.06  | 12 | 0.45 | 0.61 | 0.05 | 4.31  | 0.00 | 3.80  | 4.83  | 7.07  | 6.83  | 1.07 | 4.74  | 8.92  | 9.69  |
| Malysa et al (2022) [37] | Empress CAD IPS        | HF 5%          | .                  | NO                        | Panavia SA       | SBS  | 13.96 | 12 | 1.92 | 2.55  | 12 | 0.55 | 1.41 | 0.00 | 11.41 | 0.00 | 10.21 | 12.61 | 8.06  | 7.79  | 1.20 | 5.44  | 10.13 | 20.75 |
| Malysa et al (2022) [37] | Empress CAD IPS        | HF 5%          | Thermal Cycling    | NO                        | Panavia SA       | SBS  | 2.98  | 12 | 0.67 | 2.55  | 12 | 0.55 | 0.61 | 0.27 | 0.43  | 0.10 | -0.09 | 0.95  | 0.70  | 0.68  | 0.42 | -0.14 | 1.50  | 0.78  |
| Malysa et al (2022) [37] | Empress CAD IPS e max. | HF 5%          | No Thermal cycling | NO                        | Panavia SA       | SBS  | 16.94 | 12 | 1.53 | 2.55  | 12 | 0.55 | 1.15 | 0.00 | 14.39 | 0.00 | 13.41 | 15.37 | 12.50 | 12.06 | 1.79 | 8.56  | 15.57 | 26.16 |
| Malysa et al (2022) [37] | Zircad IPS e max.      | HF 5%          | .                  | NO                        | Panavia SA       | SBS  | 15.77 | 12 | 1.42 | 2.55  | 12 | 0.55 | 1.08 | 0.00 | 13.22 | 0.00 | 12.31 | 14.13 | 12.25 | 11.82 | 1.75 | 8.39  | 15.26 | 24.04 |
| Malysa et al (2022) [37] | Zircad                 | HF 5%          | No Thermal cycling | NO                        | Panavia SA       | SBS  | 18.31 | 12 | 1.36 | 2.55  | 12 | 0.55 | 1.04 | 0.00 | 15.76 | 0.00 | 14.88 | 16.64 | 15.22 | 14.70 | 2.16 | 10.46 | 18.93 | 28.65 |
| Malysa et al (2022) [37] | IPS e.max CAD          | HF 5% + PA 37% | .                  | NO                        | Panavia SA       | SBS  | 6.68  | 12 | 1.16 | 2.55  | 12 | 0.55 | 0.91 | 0.01 | 4.13  | 0.00 | 3.36  | 4.90  | 4.54  | 4.39  | 0.75 | 2.91  | 5.86  | 7.51  |
| Malysa et al (2022) [37] | IPS e.max CAD          | HF 5% + PA 37% | No Thermal cycling | NO                        | Panavia SA       | SBS  | 9.89  | 12 | 0.93 | 2.55  | 12 | 0.55 | 0.76 | 0.05 | 7.34  | 0.00 | 6.69  | 7.98  | 9.64  | 9.30  | 1.40 | 6.55  | 12.05 | 13.34 |
| Malysa et al (2022) [37] | IPS e.max CAD          | HF 5% + PA 37% | Thermal Cycling    | NO                        | Panavia SA       | SBS  | 3.21  | 12 | 0.59 | 2.55  | 12 | 0.55 | 0.57 | 0.41 | 0.66  | 0.01 | 0.18  | 1.14  | 1.16  | 1.12  | 0.44 | 0.26  | 1.98  | 1.20  |
| Malysa et al (2022) [37] | Empress CAD IPS        | HF 5%          | Thermal Cycling    | NO                        | Panavia V5       | SBS  | 16.84 | 12 | 0.84 | 3.06  | 12 | 0.95 | 0.90 | 0.35 | 13.78 | 0.00 | 13.02 | 14.54 | 15.32 | 14.79 | 2.17 | 10.53 | 19.05 | 14.48 |
| Malysa et al (2022) [37] | Empress CAD IPS        | HF 5%          | No Thermal cycling | NO                        | Panavia V5       | SBS  | 20.33 | 12 | 0.79 | 3.06  | 12 | 0.95 | 0.87 | 0.27 | 17.27 | 0.00 | 16.53 | 18.01 | 19.77 | 19.09 | 2.79 | 13.63 | 24.55 | 18.14 |
| Malysa et al (2022) [37] | Empress CAD IPS e max. | HF 5%          | .                  | NO                        | Panavia V5       | SBS  | 3.49  | 12 | 1.04 | 3.06  | 12 | 0.95 | 1.00 | 0.39 | 0.43  | 0.30 | -0.42 | 1.27  | 0.43  | 0.42  | 0.41 | -0.39 | 1.22  | 0.45  |
| Malysa et al (2022) [37] | Zircad IPS e max.      | HF 5%          | .                  | NO                        | Panavia V5       | SBS  | 3.63  | 12 | 0.88 | 3.06  | 12 | 0.95 | 0.91 | 0.39 | 0.57  | 0.14 | -0.20 | 1.35  | 0.63  | 0.61  | 0.42 | -0.21 | 1.42  | 0.60  |
| Malysa et al (2022) [37] | Zircad IPS e max.      | HF 5%          | Thermal Cycling    | NO                        | Panavia V5       | SBS  | 7.60  | 12 | 0.77 | 3.06  | 12 | 0.95 | 0.86 | 0.24 | 4.54  | 0.00 | 3.81  | 5.27  | 5.26  | 5.08  | 0.84 | 3.43  | 6.72  | 4.77  |
| Malysa et al (2022) [37] | Zircad                 | HF 5%          | No Thermal cycling | NO                        | Panavia V5       | SBS  | 11.23 | 12 | 0.48 | 3.06  | 12 | 0.95 | 0.75 | 0.01 | 8.17  | 0.00 | 7.53  | 8.81  | 10.86 | 10.49 | 1.57 | 7.41  | 13.56 | 8.58  |
| Malysa et al (2022) [37] | IPS e.max CAD          | HF 5% + PA 37% | No Thermal cycling | NO                        | Panavia V5       | SBS  | 22.50 | 12 | 0.69 | 3.06  | 12 | 0.95 | 0.83 | 0.15 | 19.44 | 0.00 | 18.74 | 20.14 | 23.38 | 22.58 | 3.28 | 16.14 | 29.01 | 20.42 |
| Malysa et al (2022) [37] | IPS e.max CAD          | HF 5% + PA 37% | Thermal Cycling    | NO                        | Panavia V5       | SBS  | 19.45 | 12 | 0.56 | 3.06  | 12 | 0.95 | 0.78 | 0.05 | 16.39 | 0.00 | 15.73 | 17.05 | 20.95 | 20.23 | 2.95 | 14.45 | 26.00 | 17.22 |
| Malysa et al (2022) [37] | Empress CAD IPS        | HF 5%          | .                  | NO                        | Rely X U200      | SBS  | 11.77 | 12 | 1.90 | 1.95  | 12 | 0.52 | 1.39 | 0.00 | 9.82  | 0.00 | 8.64  | 11.00 | 7.07  | 6.82  | 1.07 | 4.73  | 8.91  | 18.88 |
| Malysa et al (2022) [37] | Empress CAD IPS        | HF 5%          | No Thermal cycling | NO                        | Rely X U200      | SBS  | 15.14 | 12 | 1.95 | 1.95  | 12 | 0.52 | 1.43 | 0.00 | 13.19 | 0.00 | 11.98 | 14.40 | 9.23  | 8.91  | 1.35 | 6.27  | 11.56 | 25.37 |
| Malysa et al (2022) [37] | Empress CAD IPS e max. | HF 5%          | Thermal Cycling    | NO                        | Rely X U200      | SBS  | 3.36  | 12 | 0.26 | 1.95  | 12 | 0.52 | 0.41 | 0.02 | 1.41  | 0.00 | 1.06  | 1.76  | 3.43  | 3.31  | 0.63 | 2.08  | 4.54  | 2.71  |
| Malysa et al (2022) [37] | Zircad IPS e max.      | HF 5% + PA 37% | No Thermal cycling | NO                        | Rely X U200      | SBS  | 22.73 | 12 | 1.15 | 1.95  | 12 | 0.52 | 0.89 | 0.01 | 20.78 | 0.00 | 20.03 | 21.53 | 23.32 | 22.51 | 3.28 | 16.09 | 28.93 | 39.96 |
| Malysa et al (2022) [37] | Zircad                 | HF 5%          | .                  | NO                        | Rely X U200      | SBS  | 20.78 | 12 | 1.20 | 1.95  | 12 | 0.52 | 0.92 | 0.01 | 18.83 | 0.00 | 18.05 | 19.61 | 20.42 | 19.71 | 2.87 | 14.08 | 25.35 | 36.21 |
| Malysa et al (2022) [37] | IPS e.max CAD          | HF 5% + PA 37% | .                  | NO                        | Rely X U200      | SBS  | 5.09  | 12 | 0.91 | 1.95  | 12 | 0.52 | 0.74 | 0.04 | 3.14  | 0.00 | 2.52  | 3.77  | 4.25  | 4.10  | 0.72 | 2.69  | 5.51  | 6.04  |
| Malysa et al (2022) [37] | IPS e.max CAD          | HF 5% + PA 37% | Thermal Cycling    | NO                        | Rely X U200      | SBS  | 3.14  | 12 | 0.60 | 1.95  | 12 | 0.52 | 0.56 | 0.33 | 1.19  | 0.00 | 0.71  | 1.66  | 2.12  | 2.05  | 0.50 | 1.06  | 3.04  | 2.28  |
| Malysa et al (2022) [37] | IPS e.max CAD          | HF 5% + PA 37% | No Thermal cycling | NO                        | Rely X U200      | SBS  | 8.23  | 12 | 0.70 | 1.95  | 12 | 0.52 | 0.61 | 0.17 | 6.28  | 0.00 | 5.76  | 6.80  | 10.22 | 9.87  | 1.48 | 6.96  | 12.77 | 12.07 |
| Oda et al (2021) [25]    | Katana Avencia         | Ai2O3 50 µm    | 24 hours water     | Clearfil Cer. Primer Plus | Panavia SA Plus  | µTBS | 37.20 | 5  | 8.30 | 14.70 | 5  | 5.70 | 7.12 | 0.24 | 22.50 | 0.00 | 12.12 | 32.88 | 3.16  | 2.85  | 0.90 | 1.09  | 4.61  | 3.95  |
| Oda et al (2021) [25]    | Katana Avencia         | Ai2O3 50 µm    | 24 hours water     | Clearfil Cer. Primer Plus | Panavia SA Plus  | µTBS | 17.00 | 5  | 3.70 | 14.70 | 5  | 5.70 | 4.81 | 0.21 | 2.30  | 0.47 | -4.71 | 9.31  | 0.48  | 0.43  | 0.64 | -0.82 | 1.69  | 0.40  |
| Oda et al (2021) [25]    | Katana Avencia         | Ai2O3 50 µm    | 24 hours water     | Clearfil Cer. Primer Plus | Panavia SA Plus  | µTBS | 40.30 | 5  | 9.80 | 14.70 | 5  | 5.70 | 8.02 | 0.16 | 25.60 | 0.00 | 13.91 | 37.29 | 3.19  | 2.88  | 0.90 | 1.11  | 4.65  | 4.49  |
| Oda et al (2021) [25]    | Katana Avencia         | Ai2O3 50 µm    | 24 hours water     | Clearfil Cer. Primer Plus | Panavia SA Plus  | µTBS | 23.90 | 5  | 6.80 | 14.70 | 5  | 5.70 | 6.27 | 0.37 | 9.20  | 0.05 | 0.05  | 18.35 | 1.47  | 1.32  | 0.70 | -0.04 | 2.69  | 1.61  |
| Oda et al (2021) [25]    | Katana Avencia         | Ai2O3 50 µm    | 24 hours water     | Clearfil Cer. Primer Plus | Panavia SA Univ. | µTBS | 24.50 | 5  | 6.20 | 14.70 | 5  | 5.70 | 5.96 | 0.44 | 9.80  | 0.03 | 1.11  | 18.49 | 1.65  | 1.49  | 0.71 | 0.09  | 2.89  | 1.72  |
| Oda et al (2021) [25]    | Katana Avencia         | Ai2O3 50 µm    | 24 hours water     | Clearfil Cer. Primer Plus | Panavia SA Univ. | µTBS | 34.20 | 5  | 8.10 | 14.70 | 5  | 5.70 | 7.00 | 0.26 | 19.50 | 0.00 | 9.29  | 29.71 | 2.78  | 2.51  | 0.85 | 0.86  | 4.17  | 3.42  |
| Oda et al (2021) [25]    | Katana Avencia         | Ai2O3 50 µm    | 24 hours water     | Clearfil Cer. Primer Plus | Panavia SA Univ. | µTBS | 29.50 | 5  | 7.00 | 14.70 | 5  | 5.70 | 6.38 | 0.35 | 14.80 | 0.01 | 5.49  | 24.11 | 2.32  | 2.09  | 0.79 | 0.55  | 3.64  | 2.60  |
| Poggio et al (2016) [6]  | Lava Ultimate          | No treatment   | 24h water          | SB-UA                     | Rely X Ultimate  | SBS  | 16.58 | 10 | 3.87 | 11.98 | 10 | 2.91 | 3.42 | 0.20 | 4.60  | 0.01 | 1.38  | 7.82  | 1.34  | 1.29  | 0.49 | 0.32  | 2.25  | 1.58  |

|                             |                |             |                             |                  |                  |      |       |    |      |       |    |      |      |      |       |      |       |       |       |       |      |       |       |       |
|-----------------------------|----------------|-------------|-----------------------------|------------------|------------------|------|-------|----|------|-------|----|------|------|------|-------|------|-------|-------|-------|-------|------|-------|-------|-------|
| Takahashi et al (2022) [42] | Estelite block | AI2O3 50 µm | Thermocycling 30 000 cycles | HC Primer        | Block HC Cem     | SBS  | 31.30 | 10 | 3.60 | 21.60 | 10 | 2.50 | 3.10 | 0.15 | 9.70  | 0.00 | 6.79  | 12.61 | 3.13  | 3.00  | 0.65 | 1.72  | 4.27  | 3.88  |
| Takahashi et al (2022) [42] | Estelite block | AI2O3 50 µm | Thermocycling 10 000 cycles | HC Primer        | Block HC Cem     | SBS  | 34.80 | 10 | 3.30 | 21.60 | 10 | 2.50 | 2.93 | 0.21 | 13.20 | 0.00 | 10.45 | 15.95 | 4.51  | 4.32  | 0.82 | 2.72  | 5.92  | 5.28  |
| Takahashi et al (2022) [42] | Estelite block | AI2O3 50 µm | 24h water                   | HC Primer        | Block HC Cem     | SBS  | 24.10 | 10 | 2.30 | 21.60 | 10 | 2.50 | 2.40 | 0.40 | 2.50  | 0.03 | 0.24  | 4.76  | 1.04  | 1.00  | 0.47 | 0.07  | 1.93  | 1.00  |
| Takahashi et al (2022) [42] | Estelite block | AI2O3 50 µm | 15 min water                | HC Primer        | Block HC Cem     | SBS  | 24.50 | 10 | 1.00 | 21.60 | 10 | 2.50 | 1.90 | 0.01 | 2.90  | 0.00 | 1.11  | 4.69  | 1.52  | 1.46  | 0.50 | 0.47  | 2.44  | 1.16  |
| Takahashi et al (2022) [42] | Katana Avencia | AI2O3 50 µm | Thermocycling 10 000 cycles | HC Primer        | Block HC Cem     | SBS  | 23.50 | 10 | 2.90 | 21.60 | 10 | 2.50 | 2.71 | 0.33 | 1.90  | 0.13 | -0.64 | 4.44  | 0.70  | 0.67  | 0.46 | -0.23 | 1.57  | 0.76  |
| Takahashi et al (2022) [42] | Katana Avencia | AI2O3 50 µm | 24h water                   | HC Primer        | Block HC Cem     | SBS  | 24.60 | 10 | 3.00 | 21.60 | 10 | 2.50 | 2.76 | 0.30 | 3.00  | 0.03 | 0.41  | 5.59  | 1.09  | 1.04  | 0.48 | 0.11  | 1.97  | 1.20  |
| Takahashi et al (2022) [42] | Katana Avencia | AI2O3 50 µm | 15 min water                | HC Primer        | Block HC Cem     | SBS  | 24.30 | 10 | 3.00 | 21.60 | 10 | 2.50 | 2.76 | 0.30 | 2.70  | 0.04 | 0.11  | 5.29  | 0.98  | 0.94  | 0.47 | 0.01  | 1.86  | 1.08  |
| Takahashi et al (2022) [42] | Shofu Block HC | AI2O3 50 µm | 15 min water                | HC Primer        | Block HC Cem     | SBS  | 25.50 | 10 | 2.50 | 21.60 | 10 | 2.50 | 2.50 | 0.50 | 3.90  | 0.00 | 1.55  | 6.25  | 1.56  | 1.49  | 0.51 | 0.50  | 2.49  | 1.56  |
| Takahashi et al (2022) [42] | Shofu Block HC | AI2O3 50 µm | 24h water                   | HC Primer        | Block HC Cem     | SBS  | 29.30 | 10 | 2.50 | 21.60 | 10 | 2.50 | 2.50 | 0.50 | 7.70  | 0.00 | 5.35  | 10.05 | 3.08  | 2.95  | 0.65 | 1.68  | 4.22  | 3.08  |
| Takahashi et al (2022) [42] | Shofu Block HC | AI2O3 50 µm | Thermocycling 30 000 cycles | HC Primer        | Block HC Cem     | SBS  | 19.70 | 10 | 2.70 | 21.60 | 10 | 2.50 | 2.60 | 0.41 | 1.90  | 0.12 | -0.54 | 4.34  | 0.73  | 0.70  | 0.46 | -0.20 | 1.60  | 0.76  |
| Takahashi et al (2022) [42] | Shofu Block HC | AI2O3 50 µm | Thermocycling 10 000 cycles | HC Primer        | Block HC Cem     | SBS  | 26.50 | 10 | 3.50 | 21.60 | 10 | 2.50 | 3.04 | 0.17 | 4.90  | 0.00 | 2.04  | 7.76  | 1.61  | 1.54  | 0.51 | 0.54  | 2.54  | 1.96  |
| Takahashi et al (2022) [42] | Estelite block | AI2O3 50 µm | Thermocycling 30 000 cycles | HC Primer        | Panavia SA Univ. | SBS  | 14.70 | 10 | 3.00 | 12.10 | 10 | 1.20 | 2.28 | 0.01 | 2.60  | 0.02 | 0.45  | 4.75  | 1.14  | 1.09  | 0.48 | 0.15  | 2.03  | 2.17  |
| Takahashi et al (2022) [42] | Estelite block | AI2O3 50 µm | Thermocycling 10 000 cycles | HC Primer        | Panavia SA Univ. | SBS  | 17.70 | 10 | 3.40 | 12.10 | 10 | 1.20 | 2.55 | 0.00 | 5.60  | 0.00 | 3.20  | 8.00  | 2.20  | 2.10  | 0.56 | 1.01  | 3.20  | 4.67  |
| Takahashi et al (2022) [42] | Estelite block | AI2O3 50 µm | 15 min water                | HC Primer        | Panavia SA Univ. | SBS  | 12.10 | 10 | 1.20 | 12.10 | 10 | 1.20 | 1.20 | 0.50 | 0.00  | 1.00 | -1.13 | 1.13  | 0.00  | 0.00  | 0.45 | -0.88 | 0.88  | 0.00  |
| Takahashi et al (2022) [42] | Estelite block | AI2O3 50 µm | 24h water                   | HC Primer        | Panavia SA Univ. | SBS  | 17.90 | 10 | 3.40 | 12.10 | 10 | 1.20 | 2.55 | 0.00 | 5.80  | 0.00 | 3.40  | 8.20  | 2.27  | 2.18  | 0.56 | 1.07  | 3.29  | 4.83  |
| Takahashi et al (2022) [42] | Katana Avencia | AI2O3 50 µm | Thermocycling 30 000 cycles | HC Primer        | Panavia SA Univ. | SBS  | 18.60 | 10 | 2.20 | 12.10 | 10 | 1.20 | 1.77 | 0.04 | 6.50  | 0.00 | 4.84  | 8.16  | 3.67  | 3.51  | 0.71 | 2.12  | 4.91  | 5.42  |
| Takahashi et al (2022) [42] | Katana Avencia | AI2O3 50 µm | 24h water                   | HC Primer        | Panavia SA Univ. | SBS  | 19.90 | 10 | 1.80 | 12.10 | 10 | 1.20 | 1.53 | 0.12 | 7.80  | 0.00 | 6.36  | 9.24  | 5.10  | 4.88  | 0.89 | 3.13  | 6.63  | 6.50  |
| Takahashi et al (2022) [42] | Katana Avencia | AI2O3 50 µm | 15 min water                | HC Primer        | Panavia SA Univ. | SBS  | 15.60 | 10 | 1.90 | 12.10 | 10 | 1.20 | 1.59 | 0.09 | 3.50  | 0.00 | 2.01  | 4.99  | 2.20  | 2.11  | 0.56 | 1.02  | 3.20  | 2.92  |
| Takahashi et al (2022) [42] | Katana Avencia | AI2O3 50 µm | Thermocycling 10 000 cycles | HC Primer        | Panavia SA Univ. | SBS  | 19.80 | 10 | 1.90 | 12.10 | 10 | 1.20 | 1.59 | 0.09 | 7.70  | 0.00 | 6.21  | 9.19  | 4.85  | 4.64  | 0.86 | 2.96  | 6.32  | 6.42  |
| Takahashi et al (2022) [42] | Shofu Block HC | AI2O3 50 µm | 15 min water                | HC Primer        | Panavia SA Univ. | SBS  | 14.50 | 10 | 1.50 | 12.10 | 10 | 1.20 | 1.36 | 0.26 | 2.40  | 0.00 | 1.12  | 3.68  | 1.77  | 1.69  | 0.52 | 0.67  | 2.71  | 2.00  |
| Takahashi et al (2022) [42] | Shofu Block HC | AI2O3 50 µm | Thermocycling 10 000 cycles | HC Primer        | Panavia SA Univ. | SBS  | 19.80 | 10 | 3.50 | 12.10 | 10 | 1.20 | 2.62 | 0.00 | 7.70  | 0.00 | 5.24  | 10.16 | 2.94  | 2.82  | 0.63 | 1.58  | 4.06  | 6.42  |
| Takahashi et al (2022) [42] | Shofu Block HC | AI2O3 50 µm | Thermocycling 30 000 cycles | HC Primer        | Panavia SA Univ. | SBS  | 18.50 | 10 | 2.70 | 12.10 | 10 | 1.20 | 2.09 | 0.01 | 6.40  | 0.00 | 4.44  | 8.36  | 3.06  | 2.93  | 0.64 | 1.67  | 4.20  | 5.33  |
| Takahashi et al (2022) [42] | Shofu Block HC | AI2O3 50 µm | 24h water                   | HC Primer        | Panavia SA Univ. | SBS  | 16.10 | 10 | 1.80 | 12.10 | 10 | 1.20 | 1.53 | 0.12 | 4.00  | 0.00 | 2.56  | 5.44  | 2.61  | 2.50  | 0.60 | 1.33  | 3.67  | 3.33  |
| Ustun et al (2021) [27]     | Cerasmart      | HF 5%       | Thermal aging               | Ultradent Silane | Rely X U200      | µSBS | 5.62  | 7  | 0.29 | 4.69  | 7  | 0.21 | 0.25 | 0.23 | 0.93  | 0.00 | 0.64  | 1.22  | 3.67  | 3.45  | 0.84 | 1.80  | 5.11  | 4.43  |
| Ustun et al (2021) [27]     | Cerasmart      | HF 5%       | No Thermal aging            | Ultradent Silane | Rely X U200      | µSBS | 7.48  | 7  | 0.32 | 4.69  | 7  | 0.21 | 0.27 | 0.16 | 2.79  | 0.00 | 2.47  | 3.11  | 10.31 | 9.69  | 1.91 | 5.95  | 13.43 | 13.29 |
| Ustun et al (2021) [27]     | Vita Enamic    | HF 5%       | No Thermal aging            | Ultradent Silane | Rely X U200      | µSBS | 7.14  | 7  | 0.45 | 4.69  | 7  | 0.21 | 0.35 | 0.04 | 2.45  | 0.00 | 2.04  | 2.86  | 6.98  | 6.56  | 1.35 | 3.91  | 9.20  | 11.67 |
| Ustun et al (2021) [27]     | Vita suprinity | HF 5%       | No Thermal aging            | Ultradent Silane | Rely X U200      | µSBS | 10.27 | 7  | 0.54 | 4.69  | 7  | 0.21 | 0.41 | 0.02 | 5.58  | 0.00 | 5.10  | 6.06  | 13.62 | 12.80 | 2.48 | 7.95  | 17.66 | 26.57 |
| Ustun et al (2021) [27]     | Vita suprinity | HF 5%       | Thermal aging               | Ultradent Silane | Rely X U200      | µSBS | 8.46  | 7  | 0.33 | 4.69  | 7  | 0.21 | 0.28 | 0.15 | 3.77  | 0.00 | 3.45  | 4.09  | 13.63 | 12.81 | 2.48 | 7.95  | 17.67 | 17.95 |
| Ustun et al (2021) [27]     | Cerasmart      | HF 5%       | Thermal aging               | Ultradent Silane | Rely X Ultimate  | µSBS | 7.57  | 7  | 0.37 | 4.59  | 7  | 0.41 | 0.39 | 0.40 | 2.98  | 0.00 | 2.53  | 3.43  | 7.63  | 7.17  | 1.46 | 4.32  | 10.03 | 7.27  |
| Ustun et al (2021) [27]     | Cerasmart      | HF 5%       | No Thermal aging            | Ultradent Silane | Rely X Ultimate  | µSBS | 9.89  | 7  | 0.32 | 4.59  | 7  | 0.41 | 0.37 | 0.28 | 5.30  | 0.00 | 4.87  | 5.73  | 14.41 | 13.55 | 2.62 | 8.42  | 18.67 | 12.93 |
| Ustun et al (2021) [27]     | Cerasmart      | PA 37%      | No Thermal aging            | Ultradent Silane | Rely X Ultimate  | µSBS | 8.05  | 7  | 0.26 | 4.59  | 7  | 0.41 | 0.34 | 0.15 | 3.46  | 0.00 | 3.06  | 3.86  | 10.08 | 9.47  | 1.87 | 5.81  | 13.14 | 8.44  |
| Ustun et al (2021) [27]     | Cerasmart      | PA 37%      | Thermal aging               | Ultradent Silane | Rely X Ultimate  | µSBS | 6.29  | 7  | 0.33 | 4.59  | 7  | 0.41 | 0.37 | 0.31 | 1.70  | 0.00 | 1.27  | 2.13  | 4.57  | 4.29  | 0.97 | 2.39  | 6.20  | 4.15  |
| Ustun et al (2021) [27]     | Vita Enamic    | PA 37%      | No Thermal aging            | Ultradent Silane | Rely X Ultimate  | µSBS | 7.14  | 7  | 0.12 | 4.59  | 7  | 0.41 | 0.30 | 0.00 | 2.55  | 0.00 | 2.20  | 2.90  | 8.44  | 7.94  | 1.59 | 4.81  | 11.06 | 6.22  |
| Ustun et al (2021) [27]     | Vita Enamic    | HF 5%       | Thermal aging               | Ultradent Silane | Rely X Ultimate  | µSBS | 6.37  | 7  | 0.33 | 4.59  | 7  | 0.41 | 0.37 | 0.31 | 1.78  | 0.00 | 1.35  | 2.21  | 4.78  | 4.50  | 1.00 | 2.53  | 6.46  | 4.34  |
| Ustun et al (2021) [27]     | Vita Enamic    | HF 5%       | No Thermal aging            | Ultradent Silane | Rely X Ultimate  | µSBS | 8.54  | 7  | 0.31 | 4.59  | 7  | 0.41 | 0.36 | 0.26 | 3.95  | 0.00 | 3.53  | 4.37  | 10.87 | 10.22 | 2.00 | 6.29  | 14.14 | 9.63  |
| Ustun et al (2021) [27]     | Vita suprinity | PA 37%      | Thermal aging               | SB-UA            | Rely X Ultimate  | µSBS | 8.34  | 7  | 0.30 | 4.59  | 7  | 0.41 | 0.36 | 0.23 | 3.75  | 0.00 | 3.33  | 4.17  | 10.44 | 9.81  | 1.93 | 6.03  | 13.60 | 9.15  |
| Ustun et al (2021) [27]     | Vita suprinity | PA 37%      | No Thermal aging            | Ultradent Silane | Rely X Ultimate  | µSBS | 10.90 | 7  | 0.34 | 4.59  | 7  | 0.41 | 0.38 | 0.33 | 6.31  | 0.00 | 5.87  | 6.75  | 16.75 | 15.75 | 3.02 | 9.82  | 21.68 | 15.39 |
| Ustun et al (2021) [27]     | Vita suprinity | HF 5%       | Thermal aging               | Ultradent Silane | Rely X Ultimate  | µSBS | 5.48  | 7  | 0.35 | 4.59  | 7  | 0.41 | 0.38 | 0.36 | 0.89  | 0.00 | 0.45  | 1.33  | 2.33  | 2.19  | 0.68 | 0.87  | 3.52  | 2.17  |
| Ustun et al (2021) [27]     | Vita suprinity | HF 5%       | No Thermal aging            | Ultradent Silane | Rely X Ultimate  | µSBS | 7.47  | 7  | 0.46 | 4.59  | 7  | 0.41 | 0.44 | 0.39 | 2.88  | 0.00 | 2.37  | 3.39  | 6.61  | 6.21  | 1.29 | 3.68  | 8.74  | 7.02  |
